# Supplementary material
Source: Springer Nature journal article supplement (https://www.springermedizin.de/resource/supplementary/12889_2013_5961_MOESM7_ESM.pdf/9493988)

# Number of Participants Responding by Day of Study and Experimental Group

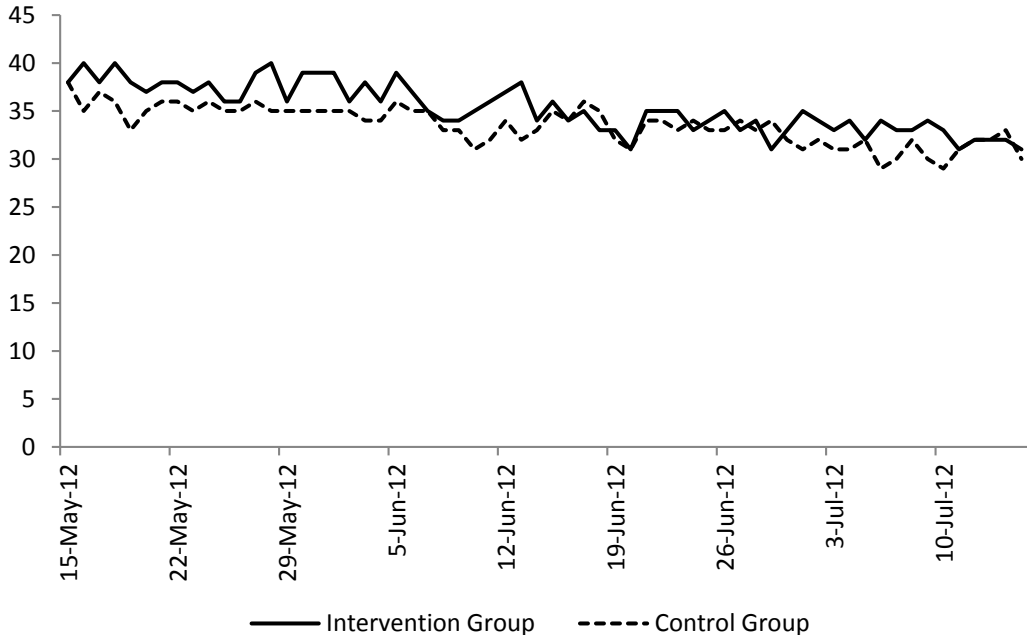

Supplement: MOESM7 [file 9493988]
